# Supplementary material for: Skin-Expressing lncRNAs in Inflammatory Responses
Source: PubMed Central journal article supplement (PMC9086234; doi:10.3389/fgene.2022.835740), 2022-04-26
Supplement: Table1.pdf [file Table1.pdf]

**Supplementary Table 1.** Other previously identified lncRNAs that play roles in skin biology and/or diseases.

| lncRNA             | Cell Type Detected  | Role                                                                                                                                                                                                                            |
|--------------------|---------------------|---------------------------------------------------------------------------------------------------------------------------------------------------------------------------------------------------------------------------------|
| <i>BC020554</i>    | KC                  | Downregulated during differentiation. Exact role unknown.                                                                                                                                                                       |
| <i>AK022798</i>    | KC                  | Upregulated during differentiation. Exact role unknown.                                                                                                                                                                         |
| <i>WAKMAR1</i>     | KC                  | DNMT-associated lncRNA that increases keratinocyte motility and re-epithelialization, which is important in wound healing [55].                                                                                                 |
| <i>PRINS</i>       | Psoriatic Epidermis | Overexpressed in epidermis of uninvolved psoriatic skin [29]. Plays a role in psoriatic susceptibility, cellular stress response, and regulation of apoptosis.                                                                  |
| <i>RP6-65G23.1</i> | Psoriatic Epidermis | Upregulated in psoriatic keratinocytes and is associated with increased anti-apoptotic cells (ie BCL2, bcl-xl). Can activate ERK1/2 and AKT pathway leading to G1/S progression, thereby increasing cell proliferation [2, 38]. |
| <i>MSX2P1</i>      | Psoriatic lesions   | Upregulated in psoriatic lesional skin. Important in assisting in the progression and growth of IL-22 stimulated keratinocyte by binding miR-6731-5p and activating S100A7 [28].                                                |
